# Supplementary material for: The Effects of Fireworks Discharge on Atmospheric PM2.5 Concentration in the Chinese Lunar New Year
Source: MDPI journal article supplement (doi:10.3390/ijerph17249333), 2020-12-13
Supplement: s1 [file s1]

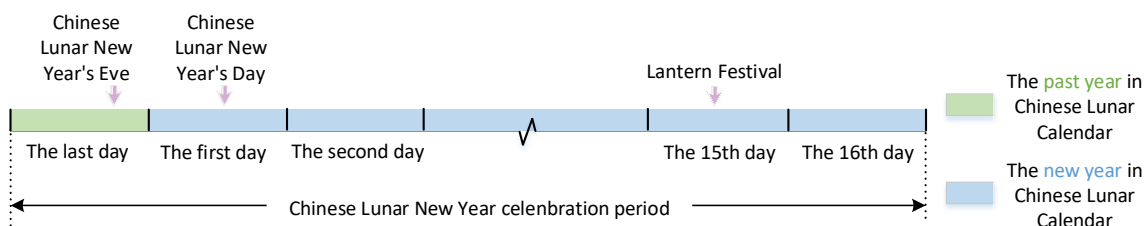

**Figure S1.** Scheme of important timing during the Chinese Lunar New Year celebration period.

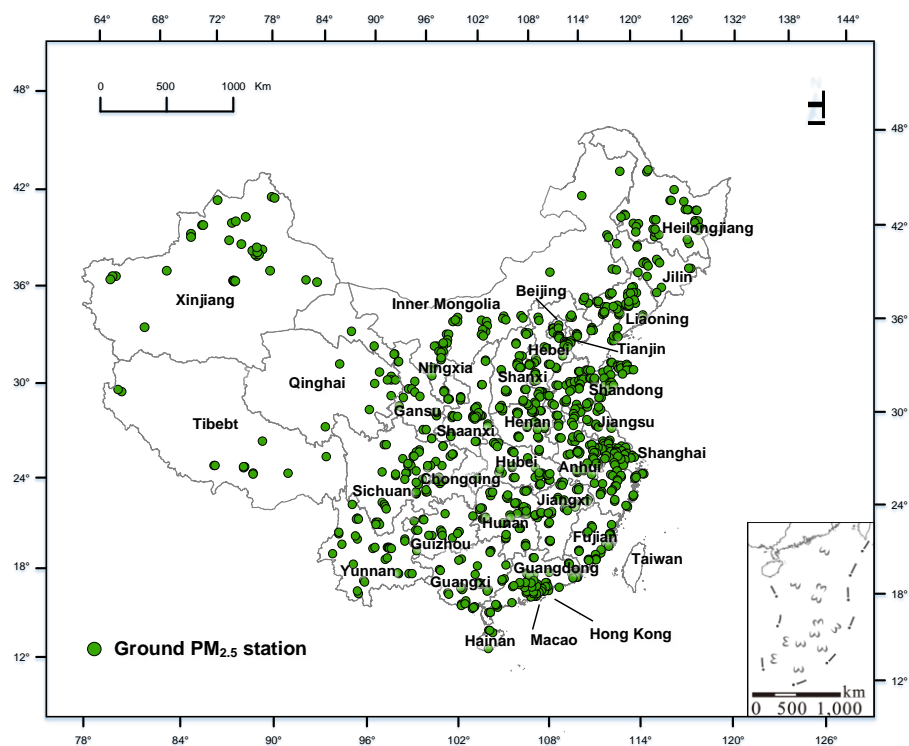

**Figure S2.** Distribution of PM<sub>2.5</sub> monitoring stations in mainland China by the end of 2016. Data and site information for Hong Kong, Macao, and Taiwan are not available for now.

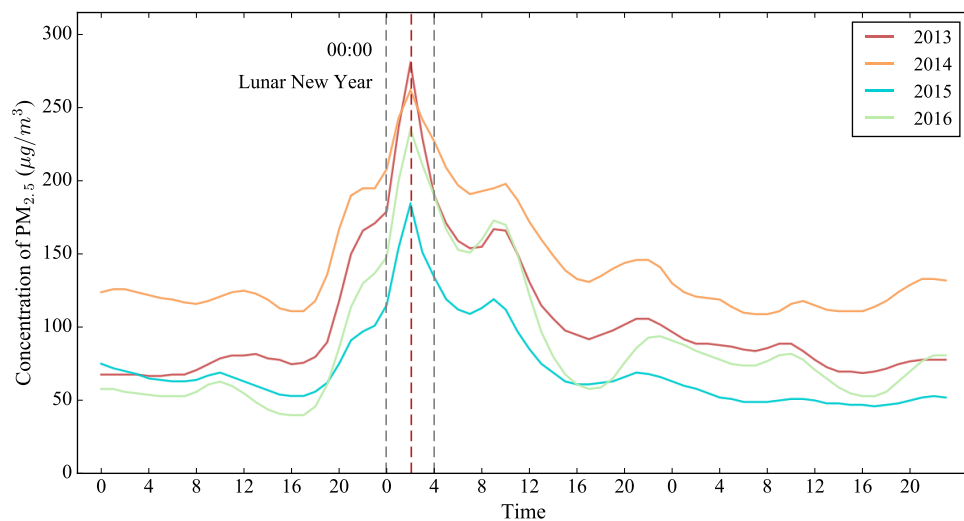

**Figure S3.** National hourly PM<sub>2.5</sub> concentration during New Year's Eve and the next two days. The dashed red line represents 02:00 on New Year's Day, and the dashed gray lines represent 0:00 and 04:00 on New Year's Day, respectively.

| Parameter                                | Code name               | Unit | Height of data acquisition                         |
|------------------------------------------|-------------------------|------|----------------------------------------------------|
| Temperature                              | TEMP                    | K    | Specified height above<br>ground/2 m <sup>a</sup>  |
| Relative humidity                        | RH                      | %    | Specified height above<br>ground/2 m               |
| Wind speed                               | WS (U-wind/ V-wind<br>) | m/s  | Specified height above<br>ground/10 m <sup>a</sup> |
| Height of<br>planetary<br>boundary layer | HPBL                    | m    | Ground or water surface                            |
| Surface pressure                         | SP                      | Pa   | Ground or water surface                            |

**Table S1.** Meteorological data information.

The data format changed from Grib1 to Grib2 after 6 December 2007, and <sup>a</sup> indicates the further supplement of measurement height information in the Grib2 format from 14 January 2015. After updating, the 2 m and 10 m measurements of temperature and wind speed data were used, respectively.

|                          |        |        |        |        |        |
|--------------------------|--------|--------|--------|--------|--------|
| Year                     | 2002   | 2003   | 2004   | 2005   | 2006   |
| Data of Chinese New Year | 12 Feb | 1 Feb  | 22 Feb | 9 Feb  | 29 Jan |
| Year                     | 2007   | 2008   | 2009   | 2010   | 2011   |
| Data of Chinese New Year | 18 Feb | 7 Feb  | 26 Jan | 14 Feb | 3 Feb  |
| Year                     | 2012   | 2013   | 2014   | 2015   | 2016   |
| Data of Chinese New Year | 23 Jan | 10 Feb | 31 Jan | 19 Feb | 8 Feb  |

**Table S2.** Chinese New Year dates in 2002-2016.

| Year | New Year's Eve | New Year's Day | Lantern Festival | The day after Lantern Festival<br>(The end of celebration period) |
|------|----------------|----------------|------------------|-------------------------------------------------------------------|
| 2013 | 9 Feb          | 10 Feb         | 24 Feb           | 25 Feb                                                            |
| 2014 | 30 Jan         | 31 Jan         | 14 Feb           | 15 Feb                                                            |
| 2015 | 18 Feb         | 19 Feb         | 5 Mar            | 6 Mar                                                             |

|      |       |       |        |        |
|------|-------|-------|--------|--------|
| 2016 | 7 Feb | 8 Feb | 22 Feb | 23 Feb |
|------|-------|-------|--------|--------|

**Table S3.** Dates of important days during 2013-2016 Chinese Lunar New Year celebration periods.

| Year | Tibetan New Year | Firework display time | Within Chinese Lunar New Year celebration period or not |
|------|------------------|-----------------------|---------------------------------------------------------|
| 2013 | 10 Feb           | 8 Feb                 | No                                                      |
| 2014 | 2 Mar            | 28 Feb                | No                                                      |
| 2015 | 19 Feb           | 17 Feb                | No                                                      |
| 2016 | 9 Feb            | 7 Feb                 | Yes, same date                                          |

**Table S4.** Tibetan New Year date and its firework display time.

The 55 ethnic minorities and the Han nationality comprise the 56 ethnic groups in China, and each ethnic minority has its own festival. The Tibetan people are one of the ethnic minorities. Tibetans are the main population group in the Tibet area, and other minorities and Han people are relative fewer in this region. In Tibetan custom, on the 29th day of the past year in the Tibetan calendar, people will discharge fireworks to celebrate New Year, too. According to the date of the Tibetan New Year and the Lunar New Year, the 2013-2015 Tibetan New Year firework displays were not in the Lunar New Year celebration period. The 2016 Tibetan New Year firework displays were the same time as the Lunar New Year. It can therefore be seen that the firework displays for the Tibetan New Year will not alter the result of the city-level PM<sub>2.5</sub> response classification.

| Year | <i>Significant</i> -response city | <i>Obvious</i> -response city | <i>Weak</i> -response city |
|------|-----------------------------------|-------------------------------|----------------------------|
| 2013 | 24                                | 5                             | 2                          |
| 2014 | 20                                | 5                             | 6                          |
| 2015 | 17                                | 8                             | 6                          |
| 2016 | 19                                | 4                             | 8                          |

**Table S5.** Classification results of PM<sub>2.5</sub> response in 31 provincial capitals during 2013-2016 celebration periods.

|                       | 2013 | 2014 | 2015 | 2016 |
|-----------------------|------|------|------|------|
| Wind speed (0.1 m/s)  | 31   | 39   | 34   | 33   |
| Precipitation (0.1mm) | 1.3  | 0.2  | 2.3  | 0    |

**Table S6.** The meteorological average values in Wuhan from 2013 to 2016.

The meteorological data values are the average data of the corresponding data on Chinese New Year's Day and the two days before and after the New Year's Day.

|                                                                 | 2013 | 2014 | 2015 | 2016 |
|-----------------------------------------------------------------|------|------|------|------|
| PM <sub>2.5</sub> concentration<br>( $\mu\text{g}/\text{m}^3$ ) | 189  | 211  | 110  | 120  |
| Wind speed (0.1 m/s)                                            | 12   | 10   | 17   | 9    |
| Precipitation (0.1mm)                                           | 2.0  | 0    | 0    | 0    |

**Table S7.** The PM<sub>2.5</sub> concentration differences and meteorological average values in Chengdu from 2013 to 2016.

The differences in PM<sub>2.5</sub> concentrations are the differences between the maximum hourly values on Chinese New Year's Day and the average values of the two days before and after the corresponding New Year's Day. The meteorological data values are the average data of the corresponding data on Chinese New Year's Day and the two days before and after the New Year's Day.

|       | Wind speed<br>(0.1 m/s) | Precipitation<br>(0.1 mm) | Relative<br>humidity<br>(1 %) | Temperature<br>(0.1 °C) | Surface<br>pressure<br>(0.1 hPa) |
|-------|-------------------------|---------------------------|-------------------------------|-------------------------|----------------------------------|
| 7 Feb | 45                      | 0                         | 24                            | 31                      | 9481                             |
| 8 Feb | 32                      | 0                         | 25.5                          | 75                      | 9437                             |
| 9 Feb | 23                      | 0                         | 27.5                          | 68                      | 9446                             |

**Table S8.** Meteorological data of Zhengzhou on New Year's Eve and the following two days in 2016.
